32 lantibiotic roseocin from *Streptomyces roseosporus* NRRL 11379, by employing a semi-*in*  
33 *vitro* reconstitution approach.

34 As with the polyketides and non-ribosomal peptide antibiotics, lantibiotics are also synthesized  
35 from a biosynthetic gene cluster (BGC). A genetically encoded lantibiotic is initially  
36 synthesized as a linear peptide (precursor peptide) with two important regions, an N-terminal  
37 leader peptide region separated by a proteolytic cleavage site from its C-terminal core-peptide  
38 region that is rich in Cys/Ser/Thr residues. While the leader peptide guides the precursor  
39 peptide to different enzymes, the core-peptide forms the final lantibiotic structure. Lantibiotics  
40 are synthesized in two steps by (1) dehydration of Ser/Thr residues in the core-peptide followed  
41 by (2) intra-peptide Michael addition of cysteine residues to form lanthionine or thioether  
42 bridges (cyclization). These lanthionine rings are installed by various enzymes which define  
43 the four classes of lantibiotics. In class I lantibiotics, two separate enzymes for dehydration  
44 (LanB) and cyclization (LanC) are encoded in the BGC along with the gene for the precursor  
45 peptide (LanA). Besides this, a lantibiotic BGC encodes a protease (LanP) for the proteolytic  
46 removal of the leader peptide, a transporter (LanT) for extracellular transport of the modified  
47 peptide, immunity proteins (LanF, LanE, LanG and sometimes LanI) and a two-component  
48 response regulation system (LanR and LanK). Class II, III and IV lantibiotic BGCs encode a  
49 single lanthionine synthetase instead of separate dehydratase and cyclase enzymes for the  
50 lanthionine ring formation. The class III and IV lantibiotics have bioactivities majorly other  
51 than antimicrobial action like morphogenetic(Ueda *et al.*, 2002), antiviral, antiallodynic(Féris  
52 *et al.*, 2013), antinociceptive (Iorio *et al.*, 2014) and antidiabetic activities(Iftime *et al.*, 2015).  
53 The class II lantibiotics with a single lanthionine synthetase are antimicrobial and also the most  
54 heterologously characterized lantibiotics.

55 In class II lantibiotics, lanthionine ring installation in the core-peptide is done by a single  
56 lanthionine synthetase LanM, followed by the concomitant proteolytic removal of the leader  
57 and extracellular transport by a bifunctional transporter (LanT<sub>p</sub>). The promiscuity of LanM in  
58 lanthionine ring installation on its precursor peptides can be low (dedicated LanM for a single  
59 peptide, as in haloduracin) to very high (single LanM acting on >17 precursor peptides in  
60 prochlorosins). Class II lantibiotics are further of two types depending upon the constituent  
61 peptides and their bioactivity. Single component lantibiotics contain peptides which are all  
62 antimicrobial (Wang *et al.*, 2014) and the two-component lantibiotics contain two different  
63 types of peptides that show synergistic antimicrobial activity. Most of the two-component  
64 lantibiotics have a lipid II binding  $\alpha$ -peptide along with a  $\beta$ -peptide, which acts in synergy with

65 the  $\alpha$ -peptide, thereby enhancing its activity manifolds (Bakhtiary *et al.*, 2017). Two-  
66 component lantibiotics are synthesized either by a single LanM which installs lanthionine rings  
67 on these two different types of peptide i.e. both on the  $\alpha$  and  $\beta$  precursor peptide (Booth *et al.*,  
68 1996; Lohans *et al.*, 2014; Huo and van der Donk, 2016), or by two separate LanM enzymes,  
69 each of which is specific to either the  $\alpha$  or the  $\beta$  precursor peptide(s) (McClerren *et al.*, 2006;  
70 Caetano *et al.*, 2011; Zhao and van der Donk, 2016). While there are many examples of  
71 characterized and putative two-component lantibiotics (Singh and Sareen, 2014; Zhang *et al.*,  
72 2015) synthesized by two LanMs, only three are known to be processed by a single LanM i.e.  
73 carnolysin and cytolysin which are homologs (Booth *et al.*, 1996; Lohans *et al.*, 2014) and  
74 bicereucin having D-amino acids as the major post-translational modification compared to  
75 lanthionine (Huo and van der Donk, 2016).

76 Understanding of genetic organization of lantibiotic encoding BGCs has led to the discovery  
77 of novel lantibiotics by combinatorial approach of genome mining, activity-based screening of  
78 the thus identified potential producers and/or *in vitro* reconstitution of BGCs from the native  
79 producers (McClerren *et al.*, 2006; Begley *et al.*, 2009). Till date, two-component lantibiotics  
80 have been isolated and are confined to only *Firmicutes* (Zhang *et al.*, 2015). In our earlier  
81 genome mining study (Singh and Sareen, 2014), we identified three putative two-component  
82 lantibiotic clusters in *Actinomycetes* having two precursor peptides and two LanMs, following  
83 a microbial genome database mining strategy for novel bifunctional transporter LanT<sub>p</sub>. In  
84 addition, a cluster identified in *S. roseosporus* NRRL 11379, encoded for a single LanM to  
85 process two precursor peptides. The presence of six cysteine residues in each of the two  
86 peptides of this cluster led us to speculate that they might form a highly constrained structure  
87 with difference in bioactivity than the existing lantibiotics. Additionally, we wanted to analyze  
88 whether these peptides show synergistic, as in two-component lantibiotics, or additive  
89 bioactivity. Hence, this cluster was undertaken for characterization by a semi-*in vitro*  
90 reconstitution approach, involving heterologous production of the lanthipeptides in *E. coli* (Shi  
91 *et al.*, 2011).

## 92 **RESULTS**

### 93 **Bioinformatic analysis of Roseocin as a two-component lantibiotic**

94 The roseocin cluster was identified following a genome mining study for novel HalT homologs  
95 (Singh and Sareen, 2014). The roseocin biosynthetic gene cluster comprises of putative genes  
96 for the two precursor peptides (RosAs), a lanthionine synthetase (RosM), a bifunctional  
97 transporter (RosT<sub>p</sub>), immunity proteins (RosEFG) and a transcriptional regulator (Figure 1 and

98 Table S1). The two RosA peptides display an overall 68% similarity (40% identity) in the 75  
 99 amino acid overlap (Figure 1B). Although the leader peptide is highly similar, the core-peptide  
 100 region is variable in the composition of lanthionine forming moieties. Both RosA1 and RosA2  
 101 contain six cysteine residues, with twelve and five Ser/Thr residues, respectively. Alignment  
 102 of RosA peptides using MUSCLE with previously characterized two-component lantibiotics  
 103 could not conclusively identify the  $\alpha$ -peptide, but the  $\beta$ -component was found conserved and  
 104 extended (Figure 1C and 1D). So, the putative  $\alpha$ -peptide which displayed limited sequence  
 105 similarity on the N-terminus, was designated as RosA2 $\alpha$ , while  $\beta$ -peptide was designated as  
 106 RosA1 $\beta$ . In general,  $\alpha$ - and  $\beta$ - component of roseocin is extended than the ones that are  
 107 previously characterized.

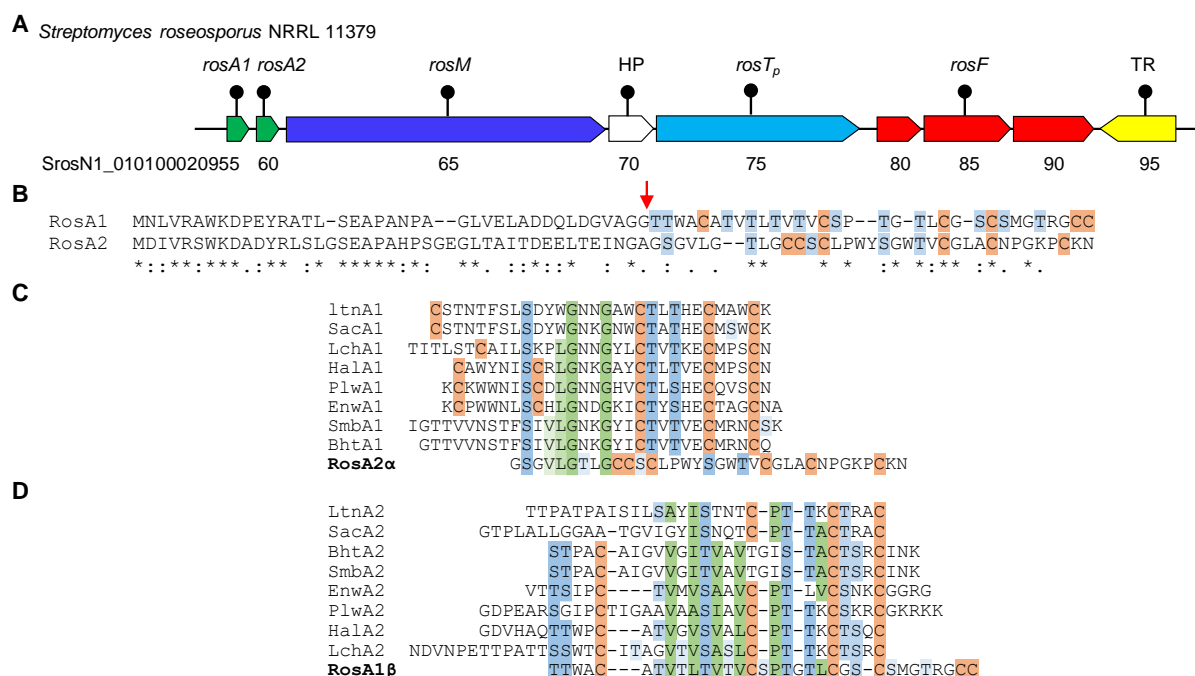

108  
 109 **Figure 1. Roseocin is a homolog of two-component lantibiotics.**  
 110 (A) The roseocin biosynthetic gene cluster encoded in *S. roseosporus* NRRL 11379. Locus tags  
 111 are mentioned below the genes. (B) Alignment of the full-length RosA1 and RosA2. The  
 112 cleavage site for the C39 protease of RosT $_p$  is present next to the double glycine motif (marked  
 113 with an arrow). (C) & (D) Multiple sequence alignment of RosA2 $\alpha$  (ZP\_04710450.1) and  
 114 RosA1 $\beta$  (ZP\_04710449.1) core-peptides with  $\alpha$ - and  $\beta$ - peptides of two-component lantibiotics  
 115 lactacin 3147 (LtnA1, LtnA2); staphylococcin C55 (SacA1, SacA2); plantaricin W (PlwA1,  
 116 PlwA2); BhtA (BhtA1, BhtA2); lichenicidin (LchA1, LchA2); haloduracin (HalA1, HalA2)  
 117 and enterocin W (EnwA1, EnwA2). HP-hypothetical protein. See also Table S1 and S5.

### 118 His<sub>6</sub>-mRosA1 and His<sub>6</sub>-mRosA2 are dehydrated by RosM *in vivo*

119 To obtain the post-translationally modified RosA peptides, two recombinant plasmids were  
 120 constructed, each having lanthionine synthetase *rosM*, together with either *rosA1* (pRSFDuet-  
 121 *rosA1-rosM*) or *rosA2* (pRSFDuet-*rosA2-rosM*). Two *E. coli* BL21(DE3) hosts, harboring each

122 of these constructs, were induced with IPTG for expression and the peptides were found in  
 123 soluble fraction. The hexahistidine tagged peptides were purified by Ni-NTA affinity  
 124 chromatography followed by RP-HPLC. A yield of approximately 4 mg of HPLC purified  
 125 product was obtained for each of the RosA peptides from one liter culture. As expected, the  
 126 two hexahistidine tagged RosA peptides were found to be modified by RosM, as MALDI-TOF

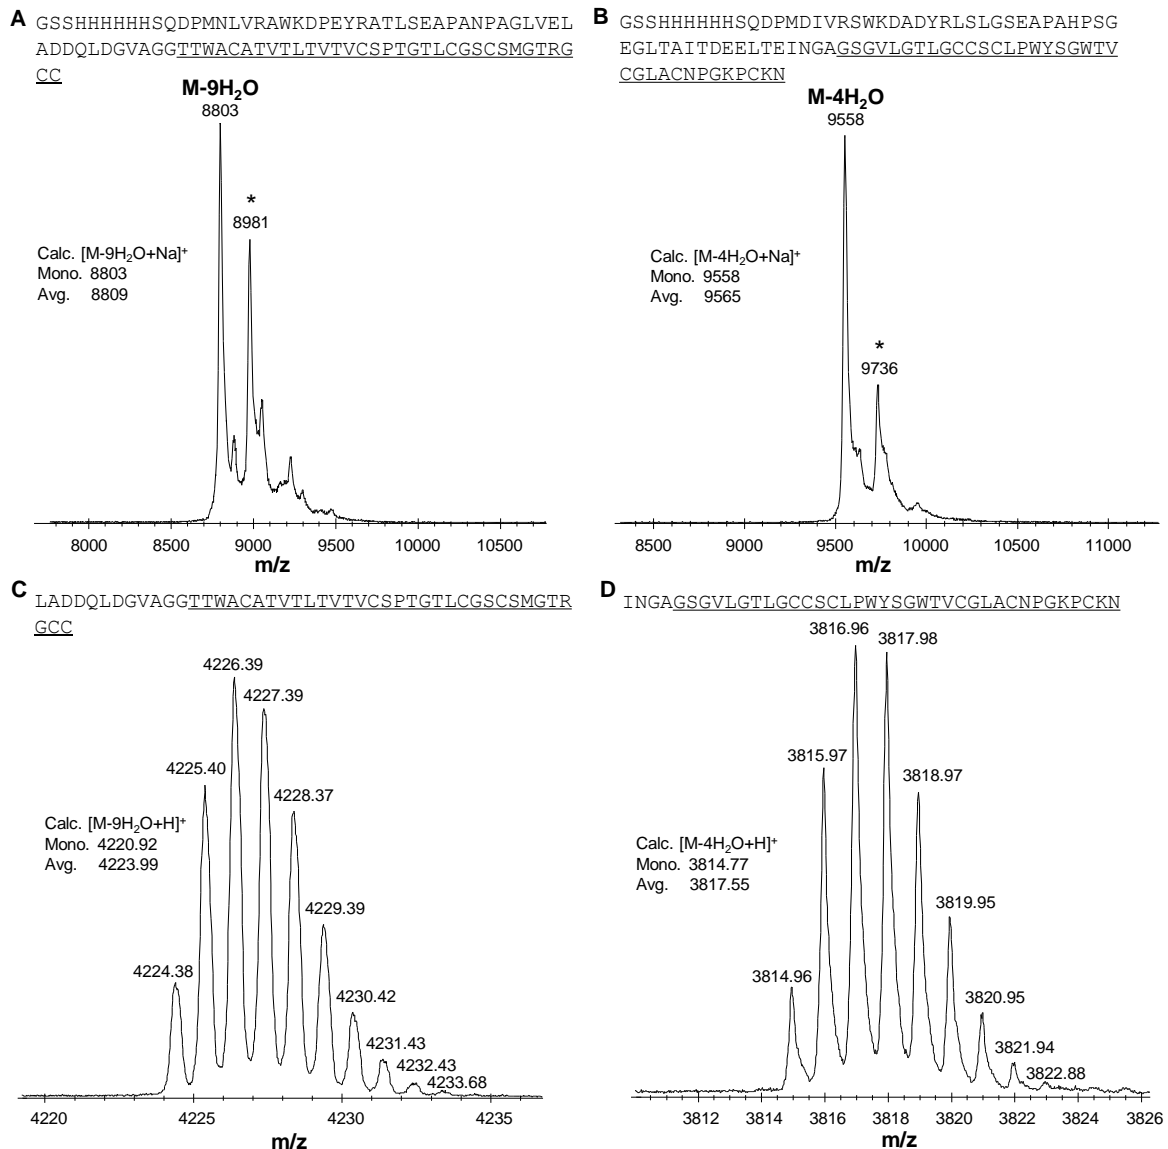

**Figure 2. His<sub>6</sub>-mRosA1 and His<sub>6</sub>-mRosA2 are dehydrated by RosM in *E. coli*.** MALDI-TOF MS spectra of purified His<sub>6</sub>-mRosA1 and His<sub>6</sub>-mRosA2. (A) His<sub>6</sub>-mRosA1 was nine-fold dehydrated with an observed mass of 8803 *m/z* (calc. mono. 8803 *m/z* [M-9H<sub>2</sub>O+Na]<sup>+</sup>). (B) His<sub>6</sub>-mRosA2 was four-fold dehydrated with an observed mass of 9558 *m/z* (calc. mono. 9558 *m/z* [M-4H<sub>2</sub>O+Na]<sup>+</sup>). An additional peak for  $\alpha$ -N-gluconoylated product (at +178 Da) was also observed for both the heterologously produced RosA peptides (marked with an asterisk). Both His<sub>6</sub>-mRosA1 and His<sub>6</sub>-mRosA2 were treated with GluC for high-resolution mass spectrometric analysis. (C) Isotopically resolved nine-fold dehydrated RosA1 $\beta$ ' with 4224.38 *m/z* (calc. mono. 4220.92 *m/z* [M-9H<sub>2</sub>O+H]<sup>+</sup>) and (D) RosA2 $\alpha$ ' with 3814.96 *m/z* (calc. mono. 3814.77 *m/z* [M-4H<sub>2</sub>O+H]<sup>+</sup>). Core peptide region is highlighted with an underline. See also Figure S1

127 MS analysis identified a reduction of mass in multiple of 18 Da from the calculated mass of  
128 the unmodified peptides (Figure 2A and 2B). His<sub>6</sub>-mRosA1 (m-indicates modified) was nine-  
129 fold dehydrated at 8803 *m/z* (calc. mono. 8803 *m/z* [M-9H<sub>2</sub>O+Na]<sup>+</sup>), with the N-terminal  
130 methionine excised by the  
131 inherent activity of *E. coli*  
132 N-aminopeptidase  
133 (Lowther and Matthews,  
134 2000). Similarly, His<sub>6</sub>-  
135 mRosA2 is four-fold  
136 dehydrated at 9558 *m/z*  
137 (calc. mono. 9558 *m/z* [M-  
138 4H<sub>2</sub>O+Na]<sup>+</sup>) along with  
139 the methionine excision.  
140 In both the peptides,  
141 number of dehydration  
142 were less than the total

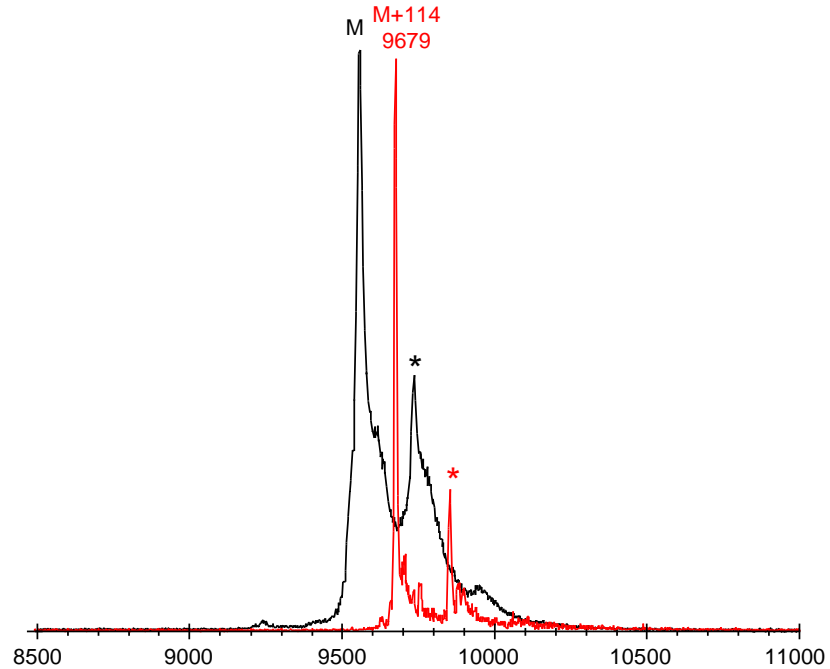

**Figure 3. His<sub>6</sub>-mRosA1 has six while His<sub>6</sub>-mRosA2 has four lanthionine rings.** Both His<sub>6</sub>-mRosA1 and His<sub>6</sub>-mRosA2 were subjected to alkylation with IAA and analyzed with MALDI TOF MS. For His<sub>6</sub>-mRosA2, a mass shift corresponding to two carbamidomethylation (+114 Da) was observed at 9679 *m/z* (calc. avg. 9679 *m/z* [M+Na+2IAA]<sup>+</sup>) indicating that two of the six cysteines residues are not cyclized. In the case of His<sub>6</sub>-mRosA1, no new peaks were observed upon alkylation (hence not shown) indicating that all of the six cysteine residues are cyclized. See also Figure S2

143 number of Ser/Thr residues present, which is not uncommon in lanthipeptide biosynthesis (Xie  
144 *et al.*, 2004), as often not all these dehydrated residues are linked into lanthionine bridges  
145 (McClerren *et al.*, 2006). An additional peak for a gluconoylated derivative was also observed  
146 for both the hexahistidine tagged RosA peptides with a mass shift of +178 Da and +258 Da.  
147 As per earlier reports, proteins that are expressed in *E. coli* with an N-terminus Gly-Ser-Ser-  
148 [His]<sub>6</sub>- undergo spontaneous  $\alpha$ -N-6-phosphogluconoylation (+258 Da) and upon removal of  
149 the phosphate by the host cell phosphatase, the mass shift becomes +178 Da (Geoghegan *et al.*,  
150 1999). However, these extra peaks for the gluconoylated product do not affect the final  
151 bioactivity, as the N-terminal region gets removed upon the *in vitro* proteolytic removal of the  
152 leader peptide. In conclusion, MALDI-TOF MS analysis confirmed the successful post-  
153 translational modification of both His<sub>6</sub>-mRosA1 and His<sub>6</sub>-mRosA2 by single RosM,  
154 heterologously. Although mass analysis of purified peptide can detect the number of

155 dehydrations, the extent of cyclization cannot be determined as there is no change in mass upon  
156 the intra-peptide Michael addition of cysteine residues to the dehydrated residues, during  
157 lanthionine ring formation.

### 158 **His<sub>6</sub>-mRosA1 has six, while His<sub>6</sub>-mRosA2 has four lanthionine rings**

159 Cysteine residue not involved in lanthionine ring can be detected by alkylation with  
160 iodoacetamide (IAA) and observed with mass spectrometry. A mass shift of +57.05 Da is  
161 observed when a carbamidomethyl adduct with free cysteine is formed (McClerren *et al.*,  
162 2006). So, the alkylation of modified peptides was carried out in reducing conditions followed  
163 by MALDI-TOF MS analysis. Alkylation of His<sub>6</sub>-mRosA1 in the presence of tris(2-  
164 carboxyethyl) phosphine (TCEP) did not lead to any change in its mass, indicating that none  
165 of the six cysteine residues are free, and are cyclized to six lanthionine rings. Alkylation of  
166 His<sub>6</sub>-mRosA2 in the presence of TCEP indicated an increase of mass corresponding to  
167 carbamidomethylation of two of the six cysteine residues with 9679 *m/z* (calc. avg. 9679 *m/z*  
168 [M-4H<sub>2</sub>O+2IAA+Na]<sup>+</sup>; Figure 3). In conclusion, His<sub>6</sub>-mRosA1 and His<sub>6</sub>-mRosA2 are installed  
169 with six and four lanthionine rings, respectively. The observation of two alkylations in His<sub>6</sub>-  
170 mRosA2, under reducing condition directed towards the possibility of a disulfide linkage,  
171 which was further investigated following the leader peptide removal.

### 172 **The core-peptides RosA2α' and RosA1β' contain multiple overlapping thioether bridges**

173 Multiple sequence alignment (MSA) of RosA peptides identified the conserved GA/GG motif  
174 which demarcates the boundary between the leader and the core-peptide (Figure 1B). Leader  
175 peptides ending in GA/GG motif are proteolytically removed by the N-terminal C39 cysteine  
176 protease domain of the bifunctional transporter LanT<sub>p</sub> and indeed such a domain is present in  
177 RosT<sub>p</sub> of the roseocin cluster (Figure 1A). For *in vitro* studies, removal of the leader peptide  
178 has been achieved using commercial proteases such as LysC, trypsin or GluC to obtain  
179 bioactive lanthipeptides (Shi *et al.*, 2011). Since, both the RosA peptides have multiple GluC  
180 cleavage sites in the leader region (at the C-terminal of glutamate residues) and none in the  
181 core-peptide, we utilized GluC for *in-vitro* removal of the leader peptide along with the  
182 hexahistidine tag. Treatment of RosA peptides with GluC removed the leader peptide, thereby  
183 reducing the size to <5kDa and thus allowed high-resolution MALDI-TOF MS, and sequence  
184 analysis with tandem MS. The GluC treated fragments were identified to be proteolytically  
185 cleaved at 3<sup>rd</sup> and 5<sup>th</sup> Glu residues for RosA1 and RosA2, respectively (Figure 2C and 2D). The

186 RosA core peptides, with the four and twelve residue trace of the leader still attached were  
 187 termed as RosA2 $\alpha'$  and RosA1 $\beta'$ .

188 In general, as reported for other lantibiotics, fragmentation was not observed in the region  
 189 protected with lanthionine rings. In case of RosA2 $\alpha'$ , for which a probable disulfide bond

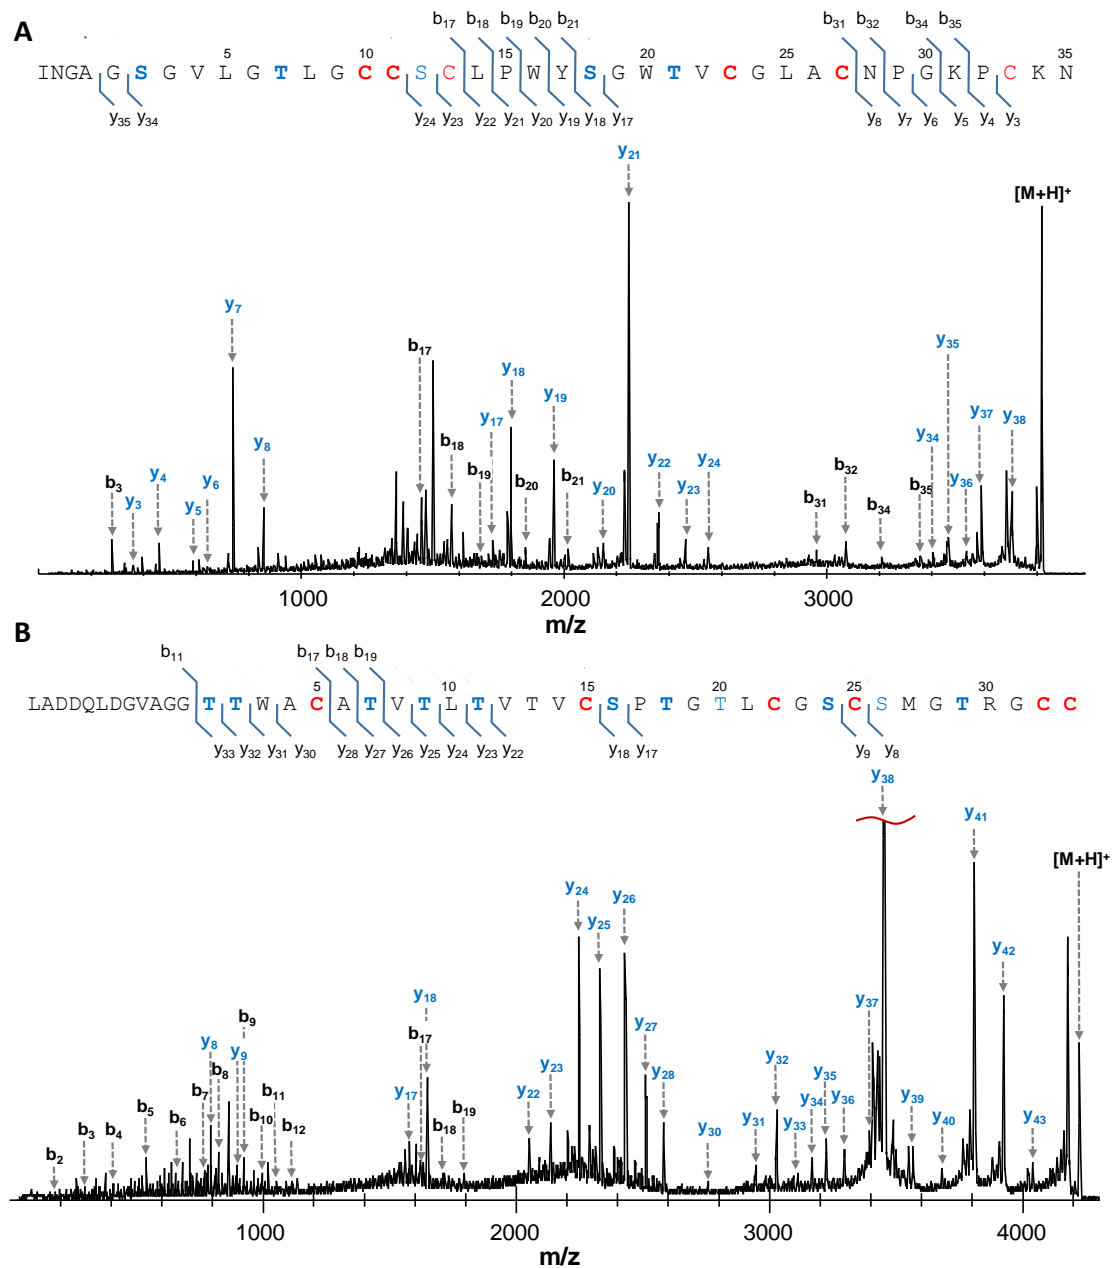

**Figure 4. RosA2 $\alpha'$  and RosA1 $\beta'$  core-peptides contain overlapping thioether bridges.**

Fragment ions were not observed in the region protected with lanthionine rings and the mass shifts corresponding to dehydrated Ser/Thr are observed. The b and y ions observed in MALDI TOF MS/MS spectrum for (A) RosA2 $\alpha'$  and (B) RosA1 $\beta'$ . Residues in bold are modified by RosM. [M+H]<sup>+</sup> indicates precursor ion. See also Figure S3, and Table S2 and S3

190 presence was speculated by alkylation assay, MS/MS analysis was carried out with both the  
 191 reduced and non-reduced forms of peptide. An increase in mass by ~2Da was observed upon



192 TCEP treatment of RosA2 $\alpha$ ' , indicating an addition of two protons to the disulfide bonded Cys  
193 residues (Figure S2). Reduction of RosA2 $\alpha$ ' also led to an enhancement in fragmentation  
194 (Figure 4A and S3) and hence identification of b and y ions with mass shifts corresponding to  
195 dehydrations of Ser/Thr residues (Table S2). MS<sup>n</sup> analysis of reduced RosA2 $\alpha$ ' identified  
196 fragment ions on either side of Cys13 and Cys33, which indicated that these regions are not  
197 protected or involved in lanthionine rings. Furthermore, it was noted that RosA2 $\alpha$ ' underwent  
198 alkylation only upon its reduction with TCEP (Figure S2), and MS/MS analysis of the alkylated  
199 RosA2 $\alpha$ ' also identified Cys13 and Cys33 residues to be carbamidomethylated (Figure S4).  
200 Identification of distant cysteines as disulfide partners indicated RosA2 $\alpha$ ' to be having a  
201 conformationally constrained structure. Also, no fragment ions were observed in two long  
202 stretches indicating the presence of thioether bridges in the region (Figure 4A). For RosA1 $\beta$ ' ,  
203 MS/MS data along with the absence of alkylation, suggested cyclization of all the six cysteines  
204 into lanthionine rings (Figure 4B). Fragment ions were majorly observed for the N-terminus  
205 and a few ions in the C-terminus indicating lanthionine protection (Table S3).

206 **Figure 5. RosA2 $\alpha$ ' and RosA1 $\beta$ '**  
207 **displayed synergistic antimicrobial**  
208 **activity against *L. monocytogenes***  
209 **839.** A zone of inhibition was observed  
210 only when both the leader removed core  
211 peptides were spotted together. RosA  
212 peptides were tested at 30  $\mu$ M  
213 concentration. Sector-1, 40  $\mu$ L His<sub>6</sub>-  
214 mRosA1; Sector-2, 40  $\mu$ L His<sub>6</sub>-  
215 mRosA2; Sector-3, combined His<sub>6</sub>-  
216 mRosA1 (20  $\mu$ L) and His<sub>6</sub>-mRosA2 (20  
217  $\mu$ L); Sector-4, 40  $\mu$ L GluC digest of  
218 His<sub>6</sub>-mRosA2 (to generate RosA2 $\alpha$ ');  
219 Sector-5, 40  $\mu$ L GluC digest of His<sub>6</sub>-  
220 RosA1 (to generate RosA1 $\beta$ '); Sector-  
221 5, combined digests (20  $\mu$ L RosA2 $\alpha$ '  
222 and 20  $\mu$ L RosA1 $\beta$ '); Sector-7, 3  $\mu$ L of  
223 300  $\mu$ M nisin.

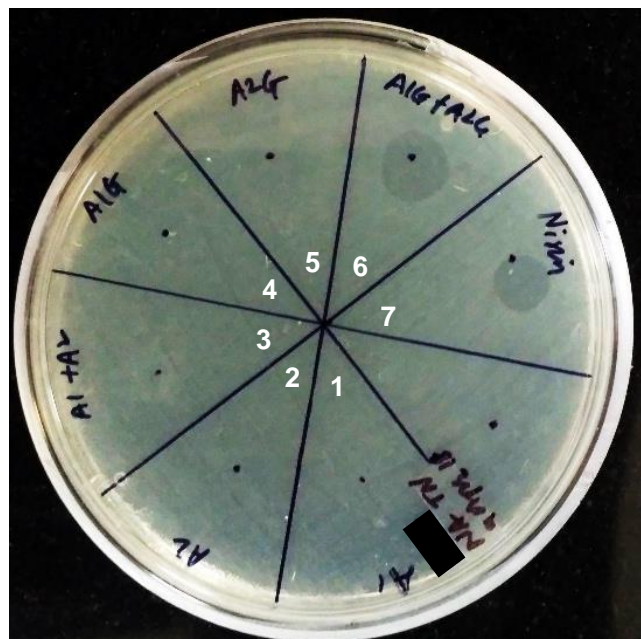

#### 224 **RosA2 $\alpha$ ' and RosA1 $\beta$ ' display synergistic antimicrobial activity**

225 RosA peptides were tested for their antimicrobial activity against *L. monocytogenes* MTCC  
226 839, *Bacillus subtilis* MTCC 121, *Staphylococcus aureus* MTCC 1430. *Pseudomonas*  
227 *aeruginosa* MTCC 1934, *Escherichia coli* MTCC 1610 and *Vibrio cholerae* MTCC 3904.  
228 RosA2 $\alpha$ ' and RosA1 $\beta$ ' did not display any antimicrobial activity when tested individually, but  
229 a zone of inhibition was observed against Gram-positive bacteria when both the peptides were

230 spotted together (Table 1). Uncleaved His<sub>6</sub>-mRosA1 and His<sub>6</sub>-mRosA2 peptides alone and in  
231 combination did not display any antimicrobial activity, as was expected from a leader peptide  
232 attached lantibiotic (Figure 5). Such a synergistic antimicrobial activity of two separate post-  
233 translationally modified peptides, which display little to no activity alone is a characteristic of  
234 two-component lantibiotics (Navaratna et al., 1998). For roseocin, antimicrobial activity was  
235 observed against tested Gram-positive bacteria except for *S. aureus* MTCC 1430 and weak to  
236 no activity was observed against Gram-negative bacteria. Another exception to this was the  
237 observation of a zone of inhibition with RosA2 $\alpha$ ' alone, against *B. subtilis* MTCC 121, which  
238 enhanced to a distinct zone with the addition of RosA1 $\beta$ ' (not shown).

239 **Table 1. Bioactivity analysis of roseocin against Gram-positive and Gram-negative bacteria.**  
240 Roseocin displayed synergistic antimicrobial activity against Gram-positive bacteria, and weak to  
241 no activity against Gram-negative bacteria.

| 242 | Indicator strain                        | RosA2 $\alpha$ | RosA1 $\alpha$ | Combined |
|-----|-----------------------------------------|----------------|----------------|----------|
| 243 | <b>Gram-positive bacteria</b>           |                |                |          |
| 244 | <i>Listeria monocytogenes</i> MTCC 839  | -              | -              | +++      |
| 245 | <i>Bacillus subtilis</i> MTCC 121       | ++             | -              | +++      |
| 246 | <i>Staphylococcus aureus</i> MTCC 1430  | -              | -              | -        |
| 247 | <b>Gram-negative bacteria</b>           |                |                |          |
| 248 | <i>Pseudomonas aeruginosa</i> MTCC 1934 | -              | -              | -        |
|     | <i>Escherichia coli</i> MTCC 1610       | -              | -              | +        |
|     | <i>Vibrio cholerae</i> MTCC 3904        | -              | -              | -        |

249 Extent of antimicrobial activity indicated by: (-) no detectable activity; (+) weak; (++) moderate; (+++) high activity.

## 250 DISCUSSION

251 Lantibiotics are believed to be the solution for the current problem of antimicrobial resistance  
252 and hence researchers are discovering novel lantibiotics through various approaches. The  
253 earlier approach was dependent upon culture-based activity screening with the limitation of re-  
254 discovery of known compounds, being time-consuming and is also subject to the selective  
255 conditions in which the culture can be induced for the secondary metabolite production.  
256 However, the currently followed *in silico* approach involves the identification of potential  
257 producers which can then be confidently taken up for wet lab experiments. In our initial attempt  
258 to identify class II lantibiotic biosynthetic gene clusters encoded in the sequenced bacteria, we  
259 reported several novel putative lantibiotic clusters. Two of these clusters reported in our study  
260 have already been characterized to encode two-component lantibiotics, bicereucin and  
261 flavecins (Huo and van der Donk, 2016; Zhao and van der Donk, 2016). The lantibiotic cluster  
262 characterized in the current study attracted our attention for its special attributes like a single  
263 RosM for processing of two RosA precursor peptides which are homologs of two-LanM

264 processed two-component lantibiotics (Figure 1). These peptides have altogether different core  
265 region, extended C-terminus and excessive Ser/Thr and Cys residues. The putative two-  
266 component lantibiotic from this *Actinomycete* was expected to be having more lanthionine  
267 rings than already reported lantibiotics, isolated from *Firmicutes* and hence would probably be  
268 more efficacious.

269 In a previous study, to interrogate the biosynthetic capacity of the potential producers, Kersten  
270 *et al.* (2011) executed a MS-guided genome mining approach for natural product  
271 peptidogenomics in eight different *Streptomyces* strains, which are the known producers of  
272 various antimicrobial natural products (Kersten *et al.*, 2011). The enormous MS data of  
273 *Streptomyces roseosporus* NRRL 15998 along with the *in silico* analysis of the genome  
274 provided by them mention the presence of a similar cluster with two precursor peptide (73 aa  
275 and 80 aa, respectively), without the identification of immunity genes. Moreover, this previous  
276 study didn't focus on the bioactivity analysis of the lanthipeptides. Also, the product of only  
277 one of the two LanA genes could be detected by them from the n-butanolic extract of *S.*  
278 *roseosporus*, and in the absence of the second gene product, it could not be studied either.  
279 However, our successful heterologous production of the two modified RosA peptides by *in*  
280 *vivo* promiscuous activity of RosM, followed by *in-vitro* leader peptide removal for generation  
281 of bioactive lanthipeptides led to the structure prediction and bioactivity evaluation of the  
282 encoded two-component lantibiotic roseocin.

283  
284 **Figure 6. Structure of**  
285 **RosA2 $\alpha$  and RosA1 $\beta$ .**  
286 Predicted structures of RosA2 $\alpha$   
287 and RosA1 $\beta$  as per the  
288 fragmentation and mass shifts  
289 obtained in the tandem MS  
290 analysis. RosA2 $\alpha$  contains a  
291 disulfide bond between Cys13  
292 and Cys33 that flank the two of  
293 the four lanthionine rings.  
294 RosA1 $\beta$  is installed with six  
295 lanthionine rings and its  
296 structure was predicted using  
297 Hal $\beta$  as the template, tandem  
298 MS analysis, and alkylation  
299 assay.

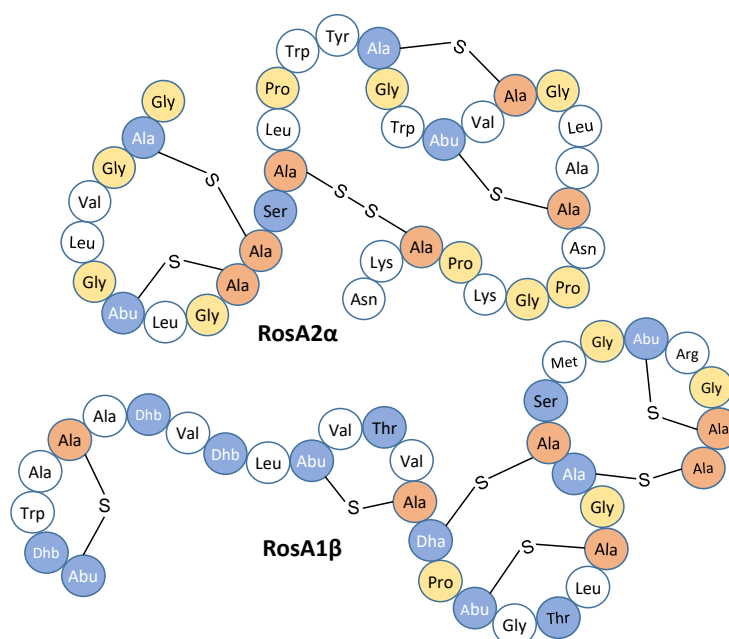

300  
301  
302 The structure of RosA2 $\alpha$ , as suggested by sequence homology and tandem MS analysis, was  
303 unlike any other previously known  $\alpha$ -component. It was initially speculated that with six

304 cysteine residues, the RosA2 $\alpha$ ' would be installed with only five lanthionine rings due to the  
305 availability of only five Ser/Thr residues, leaving one of the six cysteine residues uncyclized  
306 (Figure 1C). Unexpectedly, MALDI TOF MS analysis of the RosA2 $\alpha$ ' confirmed only four  
307 dehydrations (Figure 2B and 2D), further limiting the number of expected lanthionine rings  
308 from five to only four, leaving two of the six cysteine residues uncyclized and one of the  
309 Ser/Thr undehydrated. These unmodified residues were identified by sequence analysis with  
310 tandem MS, both with, and without the iodoacetamide treatment of TCEP reduced RosA2 $\alpha$ '.  
311 The residues Cys13, Cys33 and Ser12 were found to be unmodified by RosM (Figure 4A and  
312 S4). Moreover, alkylation was observed only in the presence of a reducing agent which  
313 indicated that these residues are involved in a disulfide bridge and hence are in the oxidized  
314 state naturally (Figure S2). While other two-component lantibiotics like Hal $\alpha$ , Plw $\alpha$ , and Enw $\alpha$   
315 have a disulfide bond between the two nearby cysteine residues, in RosA2 $\alpha$ ' these cysteine  
316 residues are distant and are found to be flanking two thioether bridges (Figure 6). The presence  
317 of this disulfide bond in RosA2 $\alpha$ ' contributed to a globular structure and prevented  
318 fragmentation in MS/MS for sequence analysis, which was made possible by reduction of this  
319 disulfide bond (Figure S3). Interestingly, the conserved lipid II binding CTxTxEC motif found  
320 in the  $\alpha$ -component of all the haloduracin related two-component lantibiotics, is absent in  
321 RosA2 $\alpha$ ' peptide. It is perplexing in light of its importance for interaction with lipid II and its  
322 conservation in all the  $\alpha$ -peptides characterized till date.

323 RosA1 $\beta$ ' with twelve Ser/Thr was speculated to undergo sufficient dehydration to form  
324 lanthionine rings with six cysteines. The mass analysis confirmed nine dehydrations of the total  
325 twelve residues (Figure 2A and 2C), which were still sufficient for six cysteines to undergo  
326 Michael addition to these residues for lanthionine formation. Indeed, the presence of six  
327 lanthionine rings was confirmed by the absence of alkylation upon iodoacetamide treatment.  
328 The structure of RosA1 $\beta$ ', as suggested by sequence homology and tandem MS data, is  
329 consistent with those of the other  $\beta$ -peptides for at least first three rings on the N-terminus  
330 (Figure 1D and 4B). Besides being an elongated peptide, RosA1 $\beta$ ' contains two additional  
331 lanthionine rings than the usual four in  $\beta$ -peptides of the other two-component lantibiotics. The  
332 presence of extra lanthionine rings could endow the peptide with a more constrained and stable  
333 structure (Figure 6), and the length extension might allow better spanning of the bacterial  
334 membrane. As with the presence of multiple sites for Michael addition (nine dehydrated  
335 residues for six cysteines), RosA1 $\beta$ ' could undertake myriad of configurations. Lack of  
336 fragmentation from the middle of the peptide till the C-terminus, probably due to thioether  
337 bridge overlaps made the assignment of the ring structure in this region difficult (Figure 4B).

338 Additionally, as the C-terminal is extended and does not show homology with known  
339 lantibiotics, a conclusive rings pattern could only be predicted. The methyllanthionine rings  
340 encoded by the Dhx-Dhx-Xxx-Xxx-Cys motif at the N-terminus of RosA1 $\beta$ , possibly has LL  
341 stereochemistry, instead of the usual DL stereochemistry. This motif has previously been  
342 associated with the formation of LL stereochemistry in flavecins (Zhao and van der Donk,  
343 2016) and carnolysin (Lohans *et al.*, 2014).

344 As with the other two-component lantibiotics, roseocin displayed synergistic antimicrobial  
345 activity primarily against the Gram-positive bacteria (Table 1) and only weak activity if any  
346 against the Gram-negative bacteria. The bioactivity was obtained even with the four- and  
347 twelve-residue long traces of the leader peptides still attached to RosA2 $\alpha$ ' and RosA1 $\beta$ ',  
348 respectively (Figure 5). The extent of proteolytic processing of lanthipeptides can be a  
349 determining factor for the bioactivity and hence, it is speculated that an enhancement would be  
350 observed upon removal of the remaining trace residues. In case of the class I lantibiotic  
351 gallidermin, a leader trace of similar length (12 aa) prevented any antimicrobial activity and  
352 removal of this trace was necessary for it to be antimicrobial (Valesia *et al.*, 2007). The type  
353 II, two-component lantibiotic lichenicidin is first processed by a bifunctional LicT<sub>p</sub> for removal  
354 of the leader peptide, which is followed by the removal of a small oligopeptide (6 aa) by  
355 subtilisin family protease LicP in order to be bioactive (Caetano *et al.*, 2011). Previous studies,  
356 where a commercial protease was utilized for leader peptide cleavage, relied on N-  
357 aminopeptidase for removal of the trace left behind by GluC treatment (Garg *et al.*, 2012; Zhao  
358 and van der Donk, 2016). This strategy was hindered in case of RosA peptides, as N-  
359 aminopeptidase activity is obstructed by the aspartate residues present in the leader trace of  
360 RosA1 $\beta$ '. As the trace allowed bioactivity and structural analysis, it was not deemed necessary  
361 to remove these residues in a second step. In future, we aim to co-express RosT<sub>p</sub> in a compatible  
362 plasmid for *in vivo* cleavage of the leader peptide, thus leading to the extracellular transport of  
363 the fully processed native roseocin peptides - RosA2 $\alpha$ , and RosA1 $\beta$  (Wang *et al.*, 2016), to  
364 ascertain any alteration or enhancement in bioactivity and for further mechanistic insights.  
365 However, the purification strategy will have to be worked-out accordingly because of the  
366 absence of the hexahistidine tag. The spectrum of Gram-positive bacteria inhibited by roseocin  
367 is required to be screened further, and the weak bioactivity against Gram-negative bacteria is  
368 ought to be enhanced by bioengineering or using hurdle technology as observed for the  
369 lantibiotic nisin (Field *et al.*, 2012).

370 A recent study described large-scale analysis of lanthipeptide biosynthetic gene clusters from  
371 *Actinobacteria* and grouped these clusters into gene cluster families (GCF) (Zhang *et al.*,

372 2015). Putative two-component lantibiotics with twelve members were grouped in  
373 Lant\_GCF.30 (encoding two LanM and two LanA substrates), none of which have been  
374 characterized experimentally. Additionally, the currently known few lantibiotics reported from  
375 *Actinobacteria* are all single peptide lantibiotics. Here, we characterized a Lant\_GCF.73 group  
376 member as a two-component lantibiotic from *S. roseosporus* NRRL 11379, which comprises  
377 of a single RosM for the synthesis of RosA2 $\alpha$  and RosA1 $\beta$ . The alpha peptide is installed with  
378 four lanthionines, and a disulfide bridge, while the beta-component comprised of six thioether  
379 bridges. Looking for the homologous clusters, we identified a biosynthetic gene cluster  
380 encoding a natural variant of roseocin in *Glycomyces harbinensis* (Labeda *et al.*, 1985). A study  
381 on such variants is important to understand the role of modifications that affect bioactivity, for  
382 designing semisynthetic derivatives with improved characteristics (Gomes *et al.*, 2017), which  
383 we plan to carry out in future. Overall, roseocin is the first example of a two-component  
384 lantibiotic from a non-*Firmicute*.

## 385 **METHODS**

### 386 **CONTACT FOR REAGENT AND RESOURCE SHARING**

387 Further information and requests for resources and reagents should be directed to and will be  
388 fulfilled by the Lead Contact, Dipti Sareen (diptsare@pu.ac.in).

### 389 **EXPERIMENTAL MODEL AND SUBJECT DETAILS**

390 *Streptomyces roseosporus* NRRL 11379 was grown in ISP2 medium (1 liter media with 4 g yeast  
391 extract, 10 g malt extract and 4 g dextrose at pH 7) at 200 rpm, 28°C for genomic DNA isolation.  
392 All the *E. coli* strains were grown in LB at 37°C, 200 rpm with or without kanamycin, as required.  
393 Indicator strains were cultured in nutrient broth at 37°C, 200 rpm, except for *B. subtilis* which was  
394 cultured at 30°C. Ready-to-use and individual media components were purchased from Himedia.

### 395 **METHOD DETAILS**

#### 396 **Cloning of *rosA1* and *rosA2* with *rosM* in pRSFDuet1 vector**

397 Genomic DNA was isolated using a previously described method (Kumar *et al.*, 2011) from *S.*  
398 *roseosporus* NRRL 11379. The three genes were PCR amplified using respective primers with  
399 restriction sites, on a *BIO-RAD* MyCycler™ Thermal Cycler using Q5 DNA polymerase. Gene  
400 for RosA1 and RosA2 was inserted in MCS-1 of pRSFDuet-1 using BamHI and HindIII sites, and  
401 RosM in MCS-2 using NdeI and XhoI restriction sites. Chemically competent *E. coli* DH10B was

402 prepared, transformed by heat shock and selected on a kanamycin plate. Colonies carrying  
403 recombinant plasmid (pRSFDuet-*rosA1-rosM* and pRSFDuet-*rosA2-rosM*) were screened by  
404 colony PCR, which was followed by gene sequencing of the complete ORF from SciGenome labs  
405 using appropriate vector-specific primers (sequencing primers in **Table S4**). The 3315 bp long  
406 *rosM* was additionally sequenced using gene-specific primers (M1, M2, and M3). Sequencing  
407 results were analyzed on FinchTV and gene sequence was found 100% identical to the sequence  
408 on NCBI. These constructs were then transformed into *E. coli* BL21(DE3) for production of  
409 modified RosA peptides.

#### 410 **Production and purification of *in vivo* modified RosA peptides**

411 A single colony was inoculated in 10 mL LB for overnight. The culture was used to inoculate 2-L  
412 of LB added with 50 µg/mL of kanamycin. The culture was incubated at 37°C, 200 rpm until the  
413 A<sub>600</sub> reached 0.6-0.8, and the temperature was lowered at this point to 18°C and induced with 0.1  
414 mM IPTG for an additional 24 hrs. The cells were harvested by centrifugation at 5000 g for 15  
415 min. The cell pellet was resuspended in 50 mL start buffer (50 mM Tris-HCl, pH 8.0, 500 mM  
416 NaCl, 1 mM Imidazole, 1 mM PMSF), and cell lysis was carried out using Sonics VC 505  
417 sonicator. The lysate was cleared by centrifugation at 25,000 g for 30 min at 4°C (on *SIGMA 3K30*  
418 using 12158 rotor). The cleared lysate was then loaded on a manually packed 2 mL Ni Sepharose™  
419 High Performance (GE Healthcare) metal affinity resin. The resin was washed with wash buffer  
420 (start buffer with 30 mM imidazole), and the peptide was eluted in elution buffer (wash buffer  
421 containing 500 mM imidazole). Eluted fractions were analyzed on 16%/6M urea tricine SDS-  
422 PAGE (Schägger H, 2006). Further purification and desalting of the eluted fractions were done  
423 with an Agilent 300 SB-C18 semi-preparative column on an Agilent 1260 infinity series HPLC  
424 system. Sample loading and desalting was done with mobile phase A (5:95 ACN:H<sub>2</sub>O, with 0.1%  
425 TFA) and gradient of 0-60% of solvent B (95:5 ACN:H<sub>2</sub>O, with 0.085% TFA) at 4 mL/min was  
426 used to elute the peptides. Elution was monitored at 220 and 280 nm. Modified His<sub>6</sub>-mRosA1 and  
427 His<sub>6</sub>-mRosA2 started eluting out at 43% and 40% of mobile phase B, respectively. Collected  
428 fractions were lyophilized and re-dissolved in MilliQ water for further analysis.

#### 429 **Molecular weight and sequence analysis of RosA peptides**

430 Matrix Assisted Laser Desorption/Ionization time-of-flight mass spectrometry (MALDI-TOF MS)  
431 was carried for determining accurate masses and post-translational modifications in the peptides,  
432 on a Bruker ultrafleXtreme™ MALDI-TOF/TOF system maintained at CSIC, PGIMER,  
433 Chandigarh. Intact peptides with mass of >5 kDa were analyzed in linear mode and proteolytic

434 digests (peptides of <5 kDa) were analyzed in the reflectron mode (high resolution mode which  
435 leads to isotopic separation). HPLC purified peptides (in 50:50 ACN:H<sub>2</sub>O 0.1% TFA) were mixed  
436 with sinapinic acid and alpha-Cyano-4-hydroxycinnamic acid (5 mg/mL in 50:50 ACN:H<sub>2</sub>O, 0.1%  
437 TFA) for analysis in linear and reflectron mode, respectively. Mass spectra were recorded in  
438 positive ion mode. The Bruker flexControl was used for data acquisition, and SeeMS and mMass  
439 program were used for data analysis.

#### 440 **Reduction and IAA modification of the RosA peptides**

441 The purified peptides in 50 mM tris HCl pH 8.0 were (1) incubated with 1 mM TCEP at 37°C for  
442 30 min for reduction of the disulphide bond, (2) followed by addition of 10 mM IAA for 60 min  
443 (kept in dark). The sample was processed to remove unbound IAA and/or TCEP with Pierce™  
444 C18 spin column before analysis with MALDI-TOF MS.

#### 445 **Preparation of bioactive roseocin and growth inhibition assay**

446 Purified peptides were dissolved in sterile MilliQ grade water and treated with 0.1 µg/µl  
447 endoproteinase GluC (P8100, NEB) in 20:1 ratio at a final concentration of 30 µM of each peptides  
448 for 16 h at 37°C. The His<sub>6</sub>-mRosA proteolytic digests were directly used for antimicrobial activity  
449 analysis. The His<sub>6</sub>-mRosA1 and His<sub>6</sub>-mRosA2 peptides were assayed as negative controls at a  
450 final concentration of 30 µM. A 40 µl volume was used for the spot of a single peptide, while 20  
451 µl of each was used for spots containing both the peptides; nisin was assayed using 3 µl of a 300  
452 µM solution. Indicator strains were grown to 0.1 OD<sub>600</sub> before spreading on agar plates using  
453 sterile cotton swab which was followed by spotting of the peptide mixture in 10 µL aliquots and  
454 allowed to dry before re-spotting again till the required volume is spotted. The plates were  
455 incubated for overnight at required temperature. A 300 µM stock of nisin was prepared using 2.5%  
456 nisin powder (Sigma - N5764) by dissolving 40 mg/mL in 0.05% acetic acid. It was allowed to  
457 dissolve for 10 min and then spun to remove any insoluble material.

#### 458 **QUANTIFICATION AND STATISTICAL ANALYSIS**

459 His<sub>6</sub>-mRosA peptides (~10 kDa) were quantitated by densitometry using lysozyme (14.4 kDa) as  
460 a standard with ImageJ 1.48v software.

#### 461 **KEY RESOURCES**

| REAGENT or RESOURCE                | SOURCE | IDENTIFIER |
|------------------------------------|--------|------------|
| <b>Bacterial and Virus Strains</b> |        |            |
| <i>Streptomyces roseosporus</i>    | NRRL   | NRRL 11379 |



|                                                                                       |                                        |                                                                                               |
|---------------------------------------------------------------------------------------|----------------------------------------|-----------------------------------------------------------------------------------------------|
| <i>Bacillus subtilis</i>                                                              | MTCC                                   | MTCC 121                                                                                      |
| <i>Staphylococcus aureus</i> subsp. <i>aureus</i>                                     | MTCC                                   | MTCC 1430                                                                                     |
| <i>Escherichia coli</i>                                                               | MTCC                                   | MTCC 1610                                                                                     |
| <i>Pseudomonas aeruginosa</i>                                                         | MTCC                                   | MTCC 1934                                                                                     |
| <i>Listeria monocytogenes</i>                                                         | MTCC                                   | MTCC 839                                                                                      |
| <i>Vibrio cholerae</i> (classical O1)                                                 | MTCC                                   | MTCC 3904                                                                                     |
| <b>Chemicals, Peptides, and Recombinant Proteins</b>                                  |                                        |                                                                                               |
| Endoproteinase, GluC                                                                  | NEB                                    | Cat#P8100S                                                                                    |
| Q5® High-Fidelity DNA Polymerase                                                      | NEB                                    | Cat#M0491S                                                                                    |
| PageRuler Low Range Unstained Protein Ladder                                          | Thermo Scientific                      | Cat#26632                                                                                     |
| Nisin                                                                                 | <i>Sigma-Aldrich</i>                   | Cat# N5764-1G                                                                                 |
| His <sub>6</sub> -mRosA1                                                              | This paper                             | N/A                                                                                           |
| His <sub>6</sub> -mRosA2                                                              | This paper                             | N/A                                                                                           |
| <b>Experimental Models: Organisms/Strains</b>                                         |                                        |                                                                                               |
| <i>E. coli</i> BL21 (DE3) pRSFDuet- <i>rosA1-rosM</i>                                 | This paper                             | N/A                                                                                           |
| <i>E. coli</i> BL21 (DE3) pRSFDuet- <i>rosA2-rosM</i>                                 | This paper                             | N/A                                                                                           |
| <b>Oligonucleotides</b>                                                               |                                        |                                                                                               |
| Primer: <i>rosA1</i> forward with BamHI site:<br>cagtgggatccGATGAACCTTGTTCGCGCATGGA   | This paper                             | N/A                                                                                           |
| Primer: <i>rosA1</i> reverse with HindIII site:<br>cagtgaagcttTCAGCAACAGCCGCGCGT      | This paper                             | N/A                                                                                           |
| Primer: <i>rosA2</i> forward with BamHI site:<br>cagtgggatccGATGGACATAGTCCGGTCCTGGA   | This paper                             | N/A                                                                                           |
| Primer: <i>rosA2</i> reverse with HindIII site:<br>cagtgaagcttCTAGTTCTTGCAGGGCTTACCGG | This paper                             | N/A                                                                                           |
| Primer: <i>rosM</i> forward with NdeI site:<br>tgcagcatATGCCTGACGACGCAAGC             | This paper                             | N/A                                                                                           |
| Primer: <i>rosM</i> forward with NdeI site:<br>acgtgctcgagTCAGCACGTCGTCCTCCC          | This paper                             | N/A                                                                                           |
| See Table S4 for primers used in sequencing                                           |                                        |                                                                                               |
| <b>Recombinant DNA</b>                                                                |                                        |                                                                                               |
| pRSFDuet-1                                                                            | Merck Millipore                        | Cat#71341-3                                                                                   |
| pRSFDuet- <i>rosA1-rosM</i>                                                           | This paper                             | N/A                                                                                           |
| pRSFDuet- <i>rosA2-rosM</i>                                                           | This paper                             | N/A                                                                                           |
| <b>Software and Algorithms</b>                                                        |                                        |                                                                                               |
| Proteomics Toolkit: MS/MS Fragment Ion calculator                                     | Institute for Systems Biology, Seattle | <a href="http://db.systemsbiology.net/">http://db.systemsbiology.net/</a>                     |
| FinchTV                                                                               | Geospiza, Inc.                         | <a href="https://digitalworldbiology.com/FinchTV">https://digitalworldbiology.com/FinchTV</a> |
| ImageJ 1.48v                                                                          | NIH                                    | <a href="https://imagej.nih.gov/ij/">https://imagej.nih.gov/ij/</a>                           |
| SeeMS 3.0.18194.0                                                                     | (Chambers <i>et al.</i> , 2012)        | <a href="http://proteowizard.sourceforge.net/">http://proteowizard.sourceforge.net/</a>       |
| mMass version 5.5.0                                                                   | (Niedermeyer and Strohm, 2012)         | <a href="http://www.mmass.org/">http://www.mmass.org/</a>                                     |
| Cello v.2.5                                                                           | (Yu <i>et al.</i> , 2006)              | <a href="http://cello.life.nctu.edu.tw/">http://cello.life.nctu.edu.tw/</a>                   |
| TMHMM server v.2.0                                                                    | (Krogh <i>et al.</i> , 2001)           | <a href="http://www.cbs.dtu.dk/services/TMHMM/">http://www.cbs.dtu.dk/services/TMHMM/</a>     |

462

463

## 464 SUPPLEMENTAL INFORMATION TITLES AND LEGENDS

465 Supplemental information includes 4 figures, and 5 tables.

## 466 AUTHOR CONTRIBUTIONS

467 Supervision D.S.; Resources D.S. Conceptualization D.S. and M.S.; Methodology D.S. and M.S.;  
468 Investigation M.S.; Formal analysis M.S.; Writing-original draft, M.S.; Writing-Review &  
469 Editing, M.S and D.S. Funding acquisition M.S. and D.S.

## 470 ACKNOWLEDGMENTS

471 MS acknowledges the independent Senior Research Fellowship (SRF) No. 3/1/3/JRF-  
472 2011/HRD-99(11005), awarded by the Indian Council of Medical Research, Government of  
473 India, New Delhi. The financial assistance received to the lab from DST-PURSE and UGC-  
474 SAP grant, Government of India, New Delhi, is also acknowledged. MALDI-TOF MS facility  
475 maintained at CSIC, PGIMER, Chandigarh is acknowledged.

## 476 REFERENCES

- 477 Bakhtiary, A., Cochrane, S.A., Mercier, P., McKay, R.T., Miskolzie, M., Sit, C.S., and  
478 Vederas, J.C. (2017) Insights into the mechanism of action of the two-peptide lantibiotic  
479 lacticin 3147. *J Am Chem Soc* **139**: 17803–17810.
- 480 Basi-Chipalu, S. (2016) A review : lantibiotics, a promising antimicrobial agent. *J Inst Sci*  
481 *Technol* **21**: 119–128.
- 482 Begley, M., Cotter, P.D., Hill, C., and Ross, R.P. (2009) Identification of a novel two-peptide  
483 lantibiotic, lichenicidin, following rational genome mining for LanM proteins. *Appl Environ*  
484 *Microbiol* **75**: 5451–5460.
- 485 Booth, M.C., Bogie, C.P., Sahl, H.G., Siezen, R.J., Hatter, K.L., and Gilmore, M.S. (1996)  
486 Structural analysis and proteolytic activation of *Enterococcus faecalis* cytolysin, a novel  
487 lantibiotic. *Mol Microbiol* **21**: 1175–1184.
- 488 Caetano, T., Krawczyk, J.M., Mösker, E., Süßmuth, R.D., and Mendo, S. (2011)  
489 Heterologous expression, biosynthesis, and mutagenesis of type II lantibiotics from *Bacillus*  
490 *licheniformis* in *Escherichia coli*. *Chem Biol* **18**: 90–100.
- 491 Chambers, M.C., Maclean, B., Burke, R., Amodei, D., Ruderman, D.L., Neumann, S., *et al.*  
492 (2012) A cross-platform toolkit for mass spectrometry and proteomics. *Nat Biotechnol* **30**:  
493 918–920.
- 494 Férir, G., Petrova, M.I., Andrei, G., Huskens, D., Hoorelbeke, B., Snoeck, R., *et al.* (2013)  
495 The lantibiotic peptide labyrinthopeptin A1 demonstrates broad anti-HIV and anti-HSV  
496 activity with potential for microbicidal applications. *PLoS One* **8**: e64010.

- 497 Field, D., Begley, M., O'Connor, P.M., Daly, K.M., Hugenholtz, F., Cotter, P.D., *et al.*  
498 (2012) Bioengineered nisin A derivatives with enhanced activity against both Gram-positive  
499 and Gram-negative pathogens. *PLoS One* **7**: e46884.
- 500 Garg, N., Tang, W., Goto, Y., Nair, S.K., and Donk, W.A. van der (2012) Lantibiotics from  
501 *Geobacillus thermodenitrificans*. *Proc Natl Acad Sci U S A* **109**: 5241–6.
- 502 Geoghegan, K.F., Dixon, H.B.F., Rosner, P.J., Hoth, L.R., Lanzetti, A.J., Borzilleri, K.A., *et*  
503 *al.* (1999) Spontaneous  $\alpha$ -N-6-phosphogluconoylation of a “His tag” in *Escherichia coli*: The  
504 cause of extra mass of 258 or 178 Da in fusion proteins. *Anal Biochem* **267**: 169–184.
- 505 Gomes, K.M., Duarte, R.S., and Bastos, M. do C. de F. (2017) Lantibiotics produced by  
506 *Actinobacteria* and their potential applications (a review). *Microbiol (United Kingdom)* **163**:  
507 109–121.
- 508 Huo, L., and Donk, W.A. van der (2016) Discovery and characterization of bicereucin, an  
509 unusual D-amino acid-containing mixed two-component lantibiotic. *J Am Chem Soc* **138**:  
510 5254–7.
- 511 Iftime, D., Jasyk, M., Kulik, A., Imhoff, J.F., Stegmann, E., Wohlleben, W., *et al.* (2015)  
512 Streptocollin, a type IV lanthipeptide produced by *Streptomyces collinus* Tü 365.  
513 *ChemBioChem* **16**: 2615–2623.
- 514 Iorio, M., Sasso, O., Maffioli, S.I., Bertorelli, R., Monciardini, P., Sosio, M., *et al.* (2014) A  
515 glycosylated, labionin-containing lanthipeptide with marked antinociceptive activity. *ACS*  
516 *Chem Biol* **9**: 398–404.
- 517 Kersten, R.D., Yang, Y.-L., Xu, Y., Cimermancic, P., Nam, S.-J., Fenical, W., *et al.* (2011) A  
518 mass spectrometry-guided genome mining approach for natural product peptidogenomics.  
519 *Nat Chem Biol* **7**: 794–802.
- 520 Krogh, A., Larsson, B., Heijne, G. von, and Sonnhammer, E.L. (2001) Predicting  
521 transmembrane protein topology with a hidden Markov model: application to complete  
522 genomes. *J Mol Biol* **305**: 567–580.
- 523 Kumar, R., Wani, S.I., Chauhan, N.S., Sharma, R., and Sareen, D. (2011) Cloning and  
524 characterization of an epoxide hydrolase from *Cupriavidus metallidurans*-CH34. *Protein*  
525 *Expr Purif* **79**: 49–59.
- 526 Labeda, D.P., Testa, R.T., Lechevalier, M.P., and Lechevalier, H.A. (1985) *Glycomyces*, a  
527 new genus of the *Actinomycetales*. *Int J Syst Bacteriol* **35**: 417–421.
- 528 Lohans, C.T., Li, J.L., and Vederas, J.C. (2014) Structure and biosynthesis of carnolysin, a  
529 homologue of enterococcal cytolysin with D-amino acids. *J Am Chem Soc* **136**: 13150–  
530 13153.
- 531 Lowther, W.T., and Matthews, B.W. (2000) Structure and function of the methionine  
532 aminopeptidases. *Biochim Biophys Acta - Protein Struct Mol Enzymol* **1477**: 157–167.
- 533 McClerren, A.L., Cooper, L.E., Quan, C., Thomas, P.M., Kelleher, N.L., and Donk, W.A.  
534 van der (2006) Discovery and *in vitro* biosynthesis of haloduracin, a two-component  
535 lantibiotic. *Proc Natl Acad Sci U S A* **103**: 17243–8.

- 536 Niedermeyer, T.H.J., and Strohal, M. (2012) mMass as a software tool for the annotation of  
537 cyclic peptide tandem mass spectra. *PLoS One* **7**: e44913.
- 538 Schägger H (2006) Tricine – SDS-PAGE. *Nat Protoc* **1**: 16–23.
- 539 Shi, Y., Yang, X., Garg, N., and Donk, W.A. van der (2011) Production of lantipeptides in  
540 *Escherichia coli*. *J Am Chem Soc* **133**: 2338–41.
- 541 Singh, M., and Sareen, D. (2014) Novel LanT associated lantibiotic clusters identified by  
542 genome database mining. *PLoS One* **9**: e91352.
- 543 Ueda, K., Oinuma, K.I., Ikeda, G., Hosono, K., Ohnishi, Y., Horinouchi, S., and Beppu, T.  
544 (2002) AmfS, an extracellular peptidic morphogen in *Streptomyces griseus*. *J Bacteriol* **184**:  
545 1488–1492.
- 546 Valsesia, G., Medaglia, G., Held, M., Minas, W., and Panke, S. (2007) Circumventing the  
547 effect of product toxicity: Development of a novel two-stage production process for the  
548 lantibiotic gallidermin. *Appl Environ Microbiol* **73**: 1635–1645.
- 549 Wang, J., Ge, X., Zhang, L., Teng, K., and Zhong, J. (2016) One-pot synthesis of class II  
550 lanthipeptide bovicin HJ50 via an engineered lanthipeptide synthetase. *Sci Rep* **6**: 38630.
- 551 Wang, J., Zhang, L., Teng, K., Sun, S., Sun, Z., and Zhong, J. (2014) Cerecidins, novel  
552 lantibiotics from *Bacillus cereus* with potent antimicrobial activity. *Appl Environ Microbiol*  
553 **80**: 2633–2643.
- 554 Xie, L., Miller, L.M., Chatterjee, C., Averin, O., Kelleher, N.L., and Donk, W.A. van der  
555 (2004) Lacticin 481: *in vitro* reconstitution of lantibiotic synthetase activity. *Science* **303**:  
556 679–681.
- 557 Yu, C., Chen, Y., Lu, C., and Hwang, J. (2006) Prediction of protein subcellular localization.  
558 *Proteins* **64**: 643–651.
- 559 Zhang, Q., Doroghazi, J.R., Zhao, X., Walker, M.C., and Donk, W.A. van der (2015)  
560 Expanded natural product diversity revealed by analysis of lanthipeptide-like gene clusters in  
561 *Actinobacteria*. *Appl Environ Microbiol* **81**: 4339–4350.
- 562 Zhao, X., and Donk, W.A. van der (2016) Structural characterization and bioactivity analysis  
563 of the two-component lantibiotic Flv system from a ruminant bacterium. *Cell Chem Biol* **23**:  
564 1–11.
- 565
